# Supplementary material
Source: publisher figshare collection journal article supplement (https://karger.figshare.com/ndownloader/files/26633306)
Supplement: Supplementary file 1 [file 26633306]

**Supplementary Content 1. Questions of the first round of the survey.**

| **QUESTIONS** | **ANSWERS** |
| --- | --- |
| 1. I certify that I am a Consultant or Attending Surgeon who currently treats pancreatic cancers and I give my consent freely to participate in this study. |  |
| 1. Could you kindly provide your email address? |  |
| 1. Hospital |  |
| 1. Age | Years |
| 1. Sex | M/F |
| 1. Specialty | general surgery/visceral surgery |
| 1. Type of the hospital | University hospital/other |
| 1. Total number of hospital beds | <100/101-200/201-500/501-1000/>1000 |
| 1. Total number of ICU beds at your hospital | <10/11-20/21-50/51-100/>100 |
| 1. How many pancreatic resections are performed approximatively at your center every year? | <10/11-20/21-50/51-100/101-200/>200 |
| 1. Do you have patients currently getting treated with COVID-19 at your hospital? | Yes/No |
| 1. How many suspected / confirmed cases of COVID-19 do you have at your hospital? | <10/11-20/21-30/31-40/41-50/>50/51-70/71-100/101-200/>200/Unknown |
| 1. Using the following system, what is the current CRITCON level of your hospital? | CRITCON 0/1/2/3/4 |
| 1. Are tumour boards at your center running as usual? | Yes (face-to-face)/No, limited number of people in the room/No, vitual tumor board (Skype)/No, they have stopped |
| 1. Endoscopic ultrasound (EUS)- Is this staging investigations still available at your hospital? | Yes, as usual/Yes, but with limited/delayed availability/Unavailable during COVID Pandemic |
| 1. Therapeutic endoscopy (i.e ERCP, Stenting) - Is this staging investigations still available at your hospital? | Yes, as usual/Yes, but with limited/delayed availability/Unavailable during COVID Pandemic |
| 1. CT imaging - Is this staging investigations still available at your hospital? | Yes, as usual/Yes, but with limited/delayed availability/Unavailable during COVID Pandemic |
| 1. MR imaging - Is this staging investigations still available at your hospital? | Yes, as usual/Yes, but with limited/delayed availability/Unavailable during COVID Pandemic |
| 1. PET scan - Is this staging investigations still available at your hospital? | Yes, as usual/Yes, but with limited/delayed availability/Unavailable during COVID Pandemic |
| 1. Staging Laparoscopy - Is this staging investigations still available at your hospital? | Yes, as usual/Yes, but with limited/delayed availability/Unavailable during COVID Pandemic |
| 1. What are your usual (pre COVID-19) curative treatment options for RESECTABLE pancreatic cancer? (Please tick all that apply) | Resection + adjuvant Chemotherapy/Neadjuvant Chemotherapy + Resection/Neoadjuvant Chemoradiotherapy + Resection/Only Chemotherapy |
| 1. What are your usual (pre COVID-19) curative treatment options for BORDERLINE/LOCAL ADVANCED pancreatic cancer? (Please tick all that apply) | Resection + adjuvant Chemotherapy/Neadjuvant Chemotherapy + Resection/Neoadjuvant Chemoradiotherapy + Resection/Palliative Chemotherapy |
| 1. What are your usual (pre COVID-19) curative treatment options for METASTATIC pancreatic cancer? (Please tick all that apply) | Resection + adjuvant Chemotherapy/Neadjuvant Chemotherapy + Resection/Neoadjuvant Chemoradiotherapy + Resection/Palliative Chemotherapy |
| 1. Who are going to perform these operations usually (before COVID-19)? | Chief+Consultant/Consultant+Consultant/Consultant+Resident/Chief+Resident |
| 1. What is your usual (before COVID-19) time to offer resection after neoadjuvant treatment? (Please sign all that apply) | Neoadjuvant therapy is not available/<6 weeks/6-8 weeks/8-10 weeks/10-12 weeks/>12 weeks |
| 1. Are you considering changing your standard treatment for curative pancreatic cancers because of the COVID-19 pandemic? | Yes/No |
| 1. What are you offering patients when treatment is likely to be limited during the COVID 19 pandemic for RESEKTABLE pancreatic cancer? (Please tick all that apply) | Resection + adjuvant Chemotherapy/Neadjuvant Chemotherapy + Resection/Neoadjuvant Chemoradiotherapy + Resection/Only Chemotherapy |
| 1. What are you offering patients when treatment is likely to be limited during the COVID 19 pandemic for BORDERLINE/LOCAL ADVANCED pancreatic cancer? (Please tick all that apply) | Resection + adjuvant Chemotherapy/Neadjuvant Chemotherapy + Resection/Neoadjuvant Chemoradiotherapy + Resection/Palliative Chemotherapy |
| 1. What are you offering patients when treatment is likely to be limited during the COVID-19 pandemic for METASTATIC pancreatic cancer? (Please tick all that apply) | Neadjuvant Chemotherapy + Resection/Neoadjuvant Chemoradiotherapy + Resection/Palliative Chemotherapy/No Chemotherapy |
| 1. If you operate during the COVID 19 pandemic, who will perform these operations? | Chief+Consultant/Consultant+Consultant/Consultant+Resident/Chief+Resident |
| 1. Because of COVID-19 pandemic and consequent limited access to ICU capacity and access to surgery, how long would you wait before surgery? | 1-2 weeks/2-4 weeks/4-6 weeks/>6 weeks |
| 1. Because of COVID-19 pandemic and consequent limited ICU capacity and reduced surgical activity, how long would you wait after neoadjuvant therapy? | No changes/Neoadjuvant therapy is not available/<6 weeks/6-8 weeks/8-10 weeks/10-12 weeks/>12 weeks |
| 1. Because of COVID-19 pandemic, have you prioritized resections? | Yes/No |
| 1. Which criteria are you using with upcoming resections to prioritize? (Please sign according the importance) | Alter/Stadium/Comorbidities/Fitness/Need for ICU Bed/Time Period after Neoadjuvant Treatment |
| 1. Did patients refuse or postpone surgery because of fear of COVID-19? | Yes/No |
| 1. During COVID-19 pandemic, are adjuvant treatments running as usual? | Yes/No - we have noticed problems or delay/No - adjuvant treatments have stopped |
| 1. During COVID-19 pandemic, is follow-up running as usual? | Yes/No - we have noticed problems or delay/No - follow-up have stopped |
| 1. Is the ambulatory service during the COVID 19 pandemic runnig as usual? | Yes/No - we visit more patients/No - we visit less patients/No - ambulatory service have stopped |
| 1. How many more/less patients do you examine during the ambulatory service? | 10%/20%/30%/50%/<50% |
| 1. Do you send post-operative patients to intensive care (ICU) unit routinely? | Yes- routinely/ Yes - not routinely/ practically never |
| 1. Do you send post-operative patients to intermediate care (IMC) unit routinely? | Yes- routinely/ Yes - not routinely/ practically never |
| 1. How long do patients normally stay in the intensive care/monitoring unit? | Some hours/one night/2 days/3-4 days/>4days |
| 1. Is there a change in the postoperative course of treatment during the COVID pandemic? | Yes - we transfer the patients back to the ward earlier/Yes - we do not transfer patients to the intensive care / monitoring unit after the operation./Yes - we are considering moving patients to another hospital./No |
| 1. During the COVID pandemic has there been a change in the management of complications? | No/Yes - we have limited/delayed radiological/endoscopic interventions/Yes - we have limited ICU beds/Both |
| 1. If you do not have intensive care capacity, how can you treat patients requiring ICU? | We are considering moving patients to another hospital./We transfer the patients back to the ward./Wir operieren die Risikopatienten nicht mehr |
| 1. During the COVID pandemic has there been a change in the post-operative lenght of stay? | No/Yes - we consider to anticipate the discharge/Yes - we consider to send patients to a different hospital/Yes - we consider to send patients to a rehabilitation center |
| 1. If patients acquire Covid-19 in the post-operative period, what do you think are the consequences? | Higher mortality/Higher morbidity, but similar mortality/No consequences, morbidity and mortality as usual/Unknown |
| 1. Do you think that this COVID-19 pandemic changed your clinical practice? | Yes/no/Maybe |
| 1. Do you think that COVID-19 pandemic is reducing the quality of your clinical practice? | Yes/no/Maybe |
| 1. Do you feel yourself under stress more than usual during the COVID-19 pandemic? | Yes/no/Maybe |
| 1. Are you discussing uncertainties and risks due to COVID-19 with patients prior to surgery? | Yes/No |
| 1. Do you think that patients are avoiding the hospital because of the COVID-19 pandemic? | Yes/No |
